# Supplementary material for: Red Squirrel Middens Influence Abundance but Not Diversity of Other Vertebrates
Source: PLoS One. 2015 Apr 29;10(4):e0123633. doi: 10.1371/journal.pone.0123633 (PMC4414347; doi:10.1371/journal.pone.0123633)
Supplement: S1 Dataset — (XLSX) [file pone.0123633.s001.xlsx]

## Sheet: Habitat & Squirrel Features
Number of quarterly surveys between 2006 and 2011 where a red squirrel was detected at each location; Vegetation features measured between May and September in 2011 and 2012 at each location; Midden features measured between May and September in 2011 and 2012 at each location
Each row represents one midden location surveyed in one year (2011 = "_1' or 2012 = "_2"), with corresponding covariates. Details on how each covariate was measured may be found in the Methods section of the corresponding manuscript.
Location ID	Residency Proportion	# Surveys Red Squirrels Present	# Red Squirrel Surveys	Average Canopy Cover (%)	Shannon Index Diversity	Log Volume (m^3 per ha)	Large Snags > 40 cm dbh (# per ha)	LargeTrees > 40cm dbh (# per ha)	Basal Area (m^2 per ha)	Slope (degrees from horizontal)	Aspect (degrees)	Tree Density (PCA1)	Tree Structure (PCA2)	Forest Floor (PCA3)	Cone Scale Pile Volume (m^3)	Red Squirrel Presence During Surveys	Cached Cone Index	Low Temperature (C)	Precipipation (mm)
1104-1	0.28571	6	21	78.468	0.623	101.76	21.93	131.58	455418	-10	285	0.121957	-0.309711	0.576511	0.5238	0	0	9.72222	0.0175
1106-1	0	0	21	56.716	0.708	117.46	21.93	87.72	305798	-8	240	-1.22219	-0.752887	1.0806	0	0	0	9.44444	0
1116-1	0.66667	14	21	83.876	0.381	31.1	0	87.72	528042	-22	5	1.14125	-1.84961	-1.6344	5.81377	0	0	2.36111	0.115
1118-1	0.90476	19	21	78.208	1.1	44.34	21.93	175.44	636345	-5	180	-0.803028	0.257507	-0.296479	5.40544	1	4	7.5	0.025
1147-1	0.09524	2	21	58.5	0.892	153.97	0	21.93	319288	-14	250	-1.52099	-1.61765	0.597722	2.73714	0	0	8.75	0.18
1149-1	0.04762	1	21	71.708	0.861	101.45	0	43.86	520032	-12	50	-0.20667	-1.32496	0.163346	1.17317	0	0	10.1389	0.085
1153-1	0.7619	16	21	65.104	0.699	124.52	21.93	109.65	584455	-10	220	-0.856662	0.140672	0.716139	2.064	0	0	2.63889	0
1156-1	0.57143	12	21	62.348	0.814	173.77	0	65.79	440843	-4	282	-0.421294	-1.56172	1.71422	13.4133	1	1	7.5	0.025
1168-1	0	0	21	65.832	1.017	74.45	21.93	43.86	628073	-8	300	-0.68948	-0.196784	0.326304	0.452	0	0	10.5556	0.213
1170-1	0.7619	16	21	73.164	0.248	92.94	65.79	131.58	928825	-14	274	0.352878	0.551535	0.204801	2.7325	0	0	2.36111	0.115
1179-1	0	0	21	59.644	1.104	175.24	43.86	43.86	325497	-9	135	-1.88121	-0.0304078	1.36056	0.2009	0	0	8.33333	0.185
1182-1	0.19048	4	21	81.12	0.848	34.17	43.86	109.65	795711	-8	240	-0.160767	0.32681	-0.848239	0	0	0	9.44444	0
2202-1	0	0	21	79.144	0.863	84.8	21.93	153.51	772364	-3	5	0.946551	-0.197978	1.25318	0	0	0	6.52778	0
2205-1	0	0	21	64.532	0.516	57.9	43.86	87.72	390962	-14	340	-0.0894352	-0.781167	0.0162454	0	0	0	9.72222	0.0175
2206-1	0.57143	12	21	77.636	0.742	67.26	21.93	131.58	530339	-12	308	0.186293	-0.248451	-0.0377948	0	0	0	9.72222	0.0175
2208-1	0.19048	4	21	79.04	0.732	71.8	43.86	197.37	611790	-9	312	0.451705	0.123147	0.29929	1.35975	0	0	6.52778	0
2218-1	0	0	21	57.304	1.083	32.79	21.93	131.58	557795	-11	359	-0.340395	-0.556251	-0.550088	0	0	0	8.75	0.0425
2241-1	0	0	21	82.16	0.944	58.31	65.79	241.23	879990	-20	24	0.568225	0.917949	-0.569489	3.35921	0	0	2.36111	0.115
5101-1	0.95238	20	21	76.596	1.109	57.08	21.93	87.72	620471	-18	281	-0.5386	0.249291	-0.69529	4.32	1	3	8.75	0.18
5119-1	0.80952	17	21	69.212	1.199	30.11	21.93	109.65	498072	-15	274	-0.912608	-0.19894	-1.20643	5.2704	1	4	10.1389	0.085
5125-1	0	0	21	53.976	1.342	141.23	21.93	87.72	714844	-8	207	-1.82639	0.731147	0.965989	0	0	0	7.5	0
5150-1	0.52381	11	21	72.28	0.904	101.62	43.86	175.44	702882	-4	248	-0.273216	0.414318	1.16014	2.03228	1	0	8.19444	0.285
5155-1	0.66667	14	21	65.572	0.787	60.44	43.86	131.58	580824	-10	230	-0.839953	0.162589	-0.070756	5.4288	1	0	8.33333	0
8002-1	0	0	21	48.932	1.06	320.77	21.93	131.58	687904	-5	280	-0.936237	0.452401	2.59387	0	0	0	10.1389	0.085
8005-1	0	0	21	77.324	0.461	26.71	0	87.72	546380	-6	338	0.954791	-2.18739	-0.856631	0	0	0	10.1389	0.085
8006-1	1	21	21	90.896	1.266	36.01	131.58	394.74	1.72252e+06	-10	310	0.902351	1.94451	-0.932967	9.0342	1	3	10.5556	0.213
8008-1	0.85714	18	21	72.28	1.252	52.83	21.93	241.23	997418	-25	18	0.0455039	0.827669	-0.872406	11.704	1	4	7.5	0
8009-1	0.85714	18	21	85.956	1.133	19.58	0	87.72	491000	-24	37	0.211271	-1.39188	-2.41956	4.4982	0	0	9.44444	0
8013-1	0.57143	12	21	75.556	1.165	91.71	87.72	241.23	783632	-10	329	0.119127	0.990794	0.573926	2.63088	0	0	9.44444	0
8016-1	0.38095	8	21	83.528	1.144	59.98	65.79	307.02	916830	-14	346	0.656274	1.0351	-0.278722	0.8658	0	0	8.19444	0.285
8019-1	0.14286	3	21	78.347	0.413	64.17	0	109.65	729697	-7	21	1.17781	-1.52306	0.0316197	3.29725	0	0	7.5	0.025
8020-1	0.66667	14	21	86.06	0.938	49.69	0	109.65	840831	-23	18	0.818833	-0.684808	-1.31487	4.94661	0	3	8.33333	0.185
8025-1	0.71429	15	21	79.768	1.269	16.36	43.86	219.3	782240	-19	206	-0.842278	0.792694	-2.40815	4.34835	0	4	2.63889	0
8029-1	0.71429	15	21	69.732	1.407	132.65	21.93	87.72	484976	-13	206	-1.67381	0.610076	0.484389	1.1316	0	0	6.52778	0
8033-1	0	0	21	72.852	1.259	67.57	0	109.65	645461	-2	22	0.354148	-1.4059	1.01085	0	0	0	7.5	0.025
8036-1	1	21	21	80.392	0.777	45.86	0	87.72	535907	-20	35	0.411386	-1.36514	-1.17063	6.985	1	2	8.33333	0
8037-1	0	0	21	59.072	1.084	36.58	21.93	87.72	407873	-7	275	-1.09185	-0.74492	-0.274319	0	0	0	8.75	0.18
8040-1	0.38095	8	21	76.804	1.176	122.74	43.86	175.44	1.12839e+06	-15	5	0.378348	1.23724	0.50535	0.16983	0	0	2.63889	0
8041-1	0.71429	15	21	88.348	1.104	65.55	65.79	219.3	743814	-10	17	0.755187	0.735493	0.0301548	0.19108	1	4	10.5556	0.213
8046-1	0.7619	16	21	71.136	1.226	76.32	43.86	131.58	657162	-7	21	-0.126394	0.292303	0.61432	0.57456	0	0	8.33333	0.185
10120-1	0	0	21	84.656	1.241	95.79	21.93	197.37	778801	-16	342	0.435029	0.741518	0.0687238	0	0	0	10.5556	0.213
10121-1	0	0	21	81.848	0.945	73.07	43.86	43.86	743852	-28	290	-0.369924	0.667869	-0.787335	0	0	0	10.5556	0.213
10122-1	0	0	21	74.464	1.298	32.46	0	43.86	278406	-7	358	-0.287879	-2.33756	-0.616869	0	0	0	8.33333	0.185
10123-1	0	0	21	60.58	0.305	16.23	43.86	197.37	821303	-38	223	-0.568757	0.104895	-2.60341	0	0	0	8.19444	0.285
10124-1	0	0	21	63.388	1.154	55.46	21.93	153.51	583114	-7	224	-1.14417	0.102885	0.00817023	0	0	0	10.1389	0.085
10125-1	0	0	21	30.524	1.352	74.36	87.72	131.58	394472	-22	228	-2.54679	0.528176	-0.0369586	0	0	0	8.33333	0
10126-1	0	0	21	69.004	1.267	13.95	65.79	153.51	799870	-20	237	-1.11345	0.663976	-2.44287	0	0	0	7.5	0
10127-1	0	0	21	60.362	1.142	116.16	0	153.51	637470	-11	344	-0.129471	-0.885749	0.616432	0	0	0	8.75	0.0425
10128-1	0	0	21	16.64	1.055	182.68	65.79	65.79	257502	-17	256	-2.49628	-0.199433	1.4119	0	0	0	9.72222	0.0175
10129-1	0	0	21	59.332	1.114	70.59	0	65.79	493805	-5	265	-0.912868	-1.45963	0.390693	0	0	0	8.75	0.18
1102-2	0.61905	10	21	82.26	0.63	125.22	21.93	592.11	698386	-22	10	1.1813	0.492486	0.391497	7.07731	0	4	10.1389	0.175
1103-2	0.57143	14	21	77.11	1.15	174.124	21.93	394.74	657842	-12	270	-0.152648	0.907768	1.01917	1.48674	0	0	10.1389	0.175
1113-2	0.28571	6	21	79.09	0.72	90.571	43.86	899.13	516264	-13	124	0.144115	0.611538	0.290854	3.44063	0	1	7.08333	0.0225
1118-2	0.90476	19	21	85.82	1.3	37.5	43.86	986.85	514520	-12	150	-0.304933	0.8513	-0.915562	5.0251	1	4	7.63889	0
1154-2	0.19048	6	21	73.15	1.32	42.764	0	1096.5	746074	-10	129	-0.149458	-0.2212	-0.832962	0.198742	0	0	10.4167	0
1156-2	0.61905	12	21	69.18	0.86	50.658	0	877.2	367526	-6	276	0.266677	-1.57277	0.104587	2.18698	1	1	4.16667	0
1162-2	0	2	21	80.48	1.07	105.483	65.79	921.06	1.23145e+06	-15	254	0.290455	1.94277	0.182349	0	0	0	10.1389	0.175
1167-2	0.14286	5	21	69.04	1.64	96.492	43.86	592.11	518340	-9	324	-0.450428	0.779708	0.845628	0.19044	0	0	4.16667	0
1175-2	0	0	21	75.38	0.726	39.693	21.93	1228.08	762385	-9	325	1.06582	0.108367	-0.301488	0	0	0	7.63889	0
1177-2	0.38095	11	21	69.63	0.477	35.965	21.93	1557.03	409107	-12	104	0.339275	-0.452769	-0.538862	0.549	0	0	7.63889	0
1184-2	0	0	21	82.01	0.897	108.115	43.86	811.41	808645	-10	313	0.87859	0.953605	0.715032	0	0	0	10.1389	0.175
1188-2	0	0	21	74.78	1.377	52.193	21.93	592.11	545677	-28	130	-0.87541	0.854267	-1.06604	1.1664	0	0	7.63889	0
1189-2	0.88889	16	18	85.03	0.616	42.983	43.86	1907.91	781919	-7	326	1.67021	0.39483	-0.0400622	1.14085	1	4	10.1389	0.175
2216-2	0.5	9	21	71.51	0.8	133.334	0	833.34	453057	-3	296	0.74556	-1.29905	1.75052	0.909022	0	0	5.27778	0
2217-2	0.14286	3	21	85.73	1.079	196.054	0	986.85	513419	-9	12	1.27679	-0.523198	1.33782	0.040775	0	0	6.94444	0.58775
2225-2	0	0	21	83.79	0.878	117.106	21.93	767.55	457162	-2	306	1.03077	-0.263819	2.02036	0	0	0	5.27778	0
2234-2	0.57143	10	21	83	0.801	41.886	0	1184.22	543894	-31	318	1.05999	-0.787091	-1.4367	0.303891	0	4	5.27778	0
2244-2	0.71429	15	21	86.22	0.68	99.562	43.86	1798.26	979901	-18	348	1.70309	1.17928	0.263481	0.297309	0	0	6.94444	0.58775
2249-2	0	0	21	79.49	0.721	137.282	0	899.13	542505	-4	333	1.42555	-1.11813	1.54782	0.0474075	0	0	5.27778	0
2252-2	0.52381	11	21	89.79	0.633	103.51	65.79	1030.71	696768	-12	338	1.58152	0.814465	0.609494	0.110272	0	0	6.94444	0.58775
5101-2	0.95238	20	21	81.22	0.95	62.72	21.93	614.04	545735	-16	268	0.181959	0.391395	-0.374533	1.11933	1	3	4.16667	0
5104-2	0	0	21	87.76	0.798	63.158	65.79	964.92	651197	-10	278	0.871588	0.794636	0.0150711	0	0	0	7.08333	0.0225
5106-2	0	0	21	80.58	0.868	77.413	21.93	1118.43	634222	-15	287	0.615505	0.569622	0.00268683	0	0	0	7.22222	0
5121-2	0.3	8	21	71.76	1.278	62.72	0	548.25	1.15345e+06	-10	284	0.234167	0.0413708	-0.384163	1.57937	0	0	4.16667	0
5123-2	0.61905	13	21	75.03	1.093	156.361	65.79	570.18	404040	-6	314	0.13552	0.397399	1.77878	1.17905	0	0	7.22222	0
5155-2	0.71429	14	21	77.16	0.829	68.202	21.93	438.6	561675	-10	190	-0.445205	0.387656	-0.105594	4.99712	0	0	7.08333	0.0225
5200-2	0.71429	17	21	76.02	1.164	52.413	43.86	811.41	1.04814e+06	-15	108	-0.0377962	1.40262	-0.628034	1.61604	1	0	7.22222	0
5232-2	0	1	21	72.75	0.853	71.711	21.93	1206.15	592837	-19	268	0.151092	0.531685	-0.192647	0.283838	0	0	4.16667	0
8001-2	0	2	21	60.86	0.949	127.413	0	438.6	311856	-16	320	-0.189169	-1.36921	0.678882	0	0	0	7.22222	0
8006-2	0.95238	20	21	82.31	1.213	64.474	131.58	394.74	1.37098e+06	-18	316	0.438504	1.94842	-0.462638	4.58481	1	3	10.4167	0
8007-2	0.57143	15	21	75.03	0.822	129.387	21.93	460.53	546789	-29	350	0.510847	0.370478	0.340292	2.53537	0	4	10.4167	0
8008-2	0.89474	18	21	69.83	1.141	126.098	21.93	526.32	834113	-18	39	0.0994722	0.958999	0.511486	3.81671	1	4	10.4167	0
8011-2	0.52632	14	21	81.07	0.917	118.203	21.93	877.2	738091	-18	348	1.01177	0.738544	0.46775	3.41634	1	0	10.4167	0
8015-2	0.7	13	21	75.03	0.424	54.386	21.93	1315.8	602553	-15	4	1.40608	-0.183714	-0.113181	4.77097	1	0	10.4167	0
8030-2	0	0	21	57.65	1.187	81.799	0	131.58	796056	-8	224	-1.06363	-0.506109	0.0692014	0	0	0	6.52778	0
8032-2	0	0	21	78.4	1.095	162.721	87.72	504.39	1.0216e+06	-15	332	0.529337	1.6649	0.948824	0	0	0	7.08333	0.0225
8034-2	0.42105	10	21	78.04	0.624	26.535	21.93	986.85	671337	-6	3	1.48307	-0.471042	-0.420713	0.0238425	0	0	6.52778	0
8036-2	1	21	21	80.08	0.564	51.974	0	789.48	482597	-19	28	1.22085	-1.27853	-0.730017	3.98278	1	2	6.52778	0
8042-2	0	0	21	75.23	0.565	187.94	43.86	1293.87	513738	-8	9	1.22573	0.277946	1.90901	0.311273	0	0	10.4167	0
8051-2	0.6	12	20	84.71	0.853	89.036	65.79	1250.01	918474	-26	10	1.26867	1.36142	-0.109464	0.851283	0	3	10.4167	0
10120-2	0	0	21	85.13	1.147	67.544	43.86	526.32	788445	-15	316	0.583309	1.00761	-0.23332	0	0	0	6.94444	0.58775
10121-2	0	0	21	87.31	1.02	52.193	0	1907.91	603800	-27	296	1.04374	-0.290804	-1.19063	0	0	0	6.94444	0.58775
10122-2	0	0	21	73.44	1.003	34.649	0	526.32	519215	-4	4	0.974266	-1.6706	-0.0482592	0	0	0	5.27778	0
10123-2	0	0	21	62	0.916	31.799	43.86	131.58	878496	-41	228	-1.18724	0.822217	-1.95628	0	0	0	6.52778	0
10124-2	0	0	21	72.6	1.609	33.992	0	219.3	553849	-12	228	-1.05641	-0.590161	-1.33081	0	0	0	10.4167	0
10125-2	0	0	21	39.67	1.33	66.667	65.79	65.79	292351	-24	238	-2.59964	-0.00707339	-0.259864	0	0	0	7.63889	0
10126-2	0	0	21	71.56	1.4	82.018	65.79	285.09	772084	-26	225	-1.17574	1.60586	-0.501718	0	0	0	10.4167	0
10127-2	0	0	21	64.23	1.134	31.141	0	504.39	347212	-12	340	0.0439303	-1.73946	-0.830841	0	0	0	7.22222	0
10128-2	0	0	21	21.39	1.332	185.747	21.93	87.72	228813	-24	239	-2.81295	-0.265191	1.06023	0	0	0	7.63889	0
10129-2	0	0	21	62.25	0.898	58.334	0	394.74	187271	-8	298	-0.354345	-2.34383	0.292787	0	0	0	7.08333	0.0225

## Sheet: yDat PEMA
Capture data for PEMA used to calculate abundance in R; intervals indicate night of trapping
Each row represents one midden location surveyed in one year (2011 = "_1' or 2012 = "_2"), with capture information for PEMA (0 = not detected, 1 = detected on each of 4 trapping days). Details of small mammal trapping methods may be found in the Methods section of the corresponding manuscript.
Location ID	interval1	interval2	interval3	interval4
1104_1	1	0	0	0
1104_1	1	1	0	0
1104_1	0	1	0	0
1104_1	0	0	1	0
1104_1	0	1	1	0
1104_1	0	0	1	0
1104_1	0	0	1	0
1104_1	1	0	0	0
1104_1	0	0	1	0
1104_1	0	0	1	0
1104_1	0	0	0	1
1104_1	0	0	0	1
1106_1	0	0	0	1
1106_1	0	1	0	1
1106_1	0	0	0	1
1106_1	0	0	0	1
1106_1	1	0	0	0
1106_1	1	0	0	0
1106_1	0	0	0	1
1106_1	0	0	0	1
1106_1	0	0	1	0
1106_1	1	0	0	0
1106_1	1	0	0	0
1106_1	0	1	1	1
1106_1	1	0	0	1
1106_1	0	1	0	1
1106_1	1	0	0	1
1106_1	0	0	1	0
1106_1	0	0	1	1
1106_1	0	0	0	1
1106_1	0	0	0	1
1106_1	1	0	1	0
1106_1	0	1	0	0
1106_1	0	0	0	1
1106_1	0	0	0	1
1106_1	1	1	0	0
1106_1	0	0	1	0
1106_1	0	0	0	1
1116_1	0	0	0	0
1118_1	0	1	0	1
1118_1	0	1	0	0
1118_1	0	0	1	0
1118_1	0	0	0	1
1118_1	0	0	1	0
1118_1	0	0	0	1
1118_1	0	0	0	1
1118_1	0	0	0	1
1118_1	1	0	0	0
1118_1	1	0	0	0
1118_1	0	1	0	0
1147_1	0	1	0	0
1147_1	0	0	1	0
1147_1	0	1	0	1
1147_1	0	1	0	1
1147_1	1	0	0	0
1147_1	0	1	0	0
1147_1	1	0	0	0
1147_1	1	0	1	0
1147_1	0	1	1	0
1147_1	0	1	0	0
1147_1	0	1	1	0
1147_1	1	0	0	0
1147_1	1	0	0	0
1147_1	1	0	0	0
1147_1	0	0	1	0
1147_1	0	0	1	0
1147_1	0	0	0	1
1147_1	0	1	0	0
1147_1	0	0	1	0
1147_1	0	1	0	0
1147_1	0	1	0	0
1149_1	0	1	0	1
1149_1	0	0	1	0
1149_1	0	1	1	0
1149_1	0	1	0	0
1149_1	0	0	0	1
1149_1	1	0	0	0
1153_1	0	1	1	0
1153_1	0	0	1	0
1153_1	0	0	1	0
1153_1	0	0	1	0
1153_1	1	0	1	0
1153_1	0	1	0	0
1153_1	1	0	0	0
1153_1	1	0	1	1
1153_1	1	1	1	0
1153_1	1	1	0	0
1153_1	0	1	0	0
1153_1	0	1	0	0
1153_1	0	0	1	0
1156_1	1	0	0	0
1156_1	1	1	0	0
1156_1	0	0	0	1
1156_1	0	1	0	0
1156_1	0	0	1	1
1156_1	1	0	0	0
1156_1	0	1	0	0
1156_1	0	0	1	0
1156_1	1	0	0	0
1156_1	0	1	0	0
1168_1	0	1	1	0
1168_1	0	0	0	1
1168_1	0	0	1	0
1168_1	0	0	1	0
1168_1	0	0	1	1
1168_1	0	0	1	1
1168_1	1	1	0	1
1168_1	0	0	1	1
1168_1	0	0	1	0
1168_1	1	0	0	1
1168_1	0	0	0	1
1168_1	0	0	0	1
1170_1	0	1	1	0
1170_1	1	0	0	1
1170_1	1	0	0	0
1170_1	0	0	1	0
1170_1	0	0	0	1
1170_1	0	0	1	1
1179_1	0	0	0	1
1179_1	0	1	0	0
1179_1	0	1	0	1
1179_1	0	0	1	0
1179_1	0	0	0	1
1179_1	0	1	0	0
1179_1	0	0	1	1
1179_1	1	0	0	0
1179_1	0	0	0	1
1179_1	0	0	1	0
1179_1	0	0	0	1
1179_1	0	1	0	0
1179_1	1	0	0	0
1182_1	0	1	0	0
1182_1	0	0	0	1
1182_1	1	0	0	0
1182_1	0	0	0	1
1182_1	0	0	0	1
1182_1	1	1	1	1
1182_1	0	0	1	1
1182_1	0	0	0	1
1182_1	1	0	0	0
1182_1	0	0	1	0
1182_1	0	1	0	0
1182_1	1	0	0	1
1182_1	0	0	0	1
1182_1	0	1	1	1
1182_1	1	0	0	0
1182_1	0	0	1	0
1182_1	0	1	0	1
1182_1	0	0	0	1
1182_1	0	0	1	0
2202_1	1	0	1	1
2202_1	1	0	0	0
2202_1	0	1	1	1
2202_1	0	0	1	0
2202_1	0	1	0	0
2202_1	0	0	1	0
2202_1	0	0	1	0
2202_1	1	0	0	0
2202_1	0	1	0	0
2202_1	1	0	1	1
2205_1	0	0	1	1
2205_1	1	1	0	0
2205_1	1	0	0	0
2205_1	0	1	1	0
2205_1	0	0	1	0
2206_1	0	1	1	0
2206_1	1	1	0	0
2206_1	0	1	1	0
2206_1	1	0	0	1
2206_1	1	0	0	0
2206_1	1	0	0	0
2208_1	1	0	0	1
2208_1	0	1	0	1
2208_1	0	0	0	1
2208_1	0	1	0	1
2208_1	0	0	0	1
2208_1	0	0	0	1
2208_1	1	0	0	0
2208_1	1	0	0	0
2218_1	0	1	0	0
2218_1	0	0	1	0
2218_1	0	0	1	0
2218_1	0	0	1	0
2218_1	0	0	1	0
2218_1	0	0	0	1
2218_1	0	1	0	0
2218_1	0	1	0	0
2241_1	0	0	1	0
2241_1	1	0	0	0
2241_1	0	1	0	0
2241_1	1	0	0	0
2241_1	0	1	0	0
2241_1	0	0	1	0
2241_1	1	1	0	0
5101_1	1	0	0	0
5101_1	1	0	0	0
5101_1	0	1	0	0
5101_1	1	0	0	0
5101_1	0	1	0	1
5101_1	0	1	0	0
5101_1	0	0	1	1
5101_1	1	0	0	0
5101_1	1	0	0	0
5101_1	1	0	0	0
5101_1	0	0	1	0
5101_1	0	0	0	1
5101_1	0	1	0	0
5101_1	0	0	0	1
5101_1	0	1	0	0
5101_1	0	1	0	0
5101_1	0	1	0	0
5101_1	1	0	0	0
5101_1	1	0	0	0
5101_1	0	1	0	0
5119_1	0	1	1	0
5119_1	0	0	1	0
5119_1	0	0	1	0
5119_1	0	0	0	1
5119_1	0	0	0	1
5119_1	0	0	0	1
5119_1	0	0	0	1
5119_1	0	0	0	1
5125_1	0	0	0	1
5125_1	1	0	0	1
5125_1	1	1	0	0
5125_1	0	1	0	1
5125_1	0	0	1	0
5125_1	0	1	0	0
5125_1	1	0	0	1
5125_1	0	0	1	1
5125_1	0	1	0	0
5125_1	0	0	0	1
5125_1	1	1	0	0
5150_1	0	0	0	1
5150_1	0	1	1	1
5150_1	0	0	0	1
5150_1	0	1	1	0
5150_1	0	0	1	0
5150_1	0	1	0	1
5150_1	1	0	1	0
5150_1	0	1	0	0
5155_1	0	0	0	1
5155_1	1	1	1	0
5155_1	0	0	1	0
5155_1	1	1	0	0
5155_1	1	0	0	0
5155_1	0	1	0	0
5155_1	1	0	0	0
5155_1	0	1	0	0
5155_1	0	1	0	0
8002_1	0	1	0	0
8002_1	0	1	0	0
8002_1	0	1	0	0
8002_1	0	1	0	0
8002_1	0	1	0	0
8005_1	0	1	0	0
8005_1	0	1	0	0
8005_1	0	0	0	1
8005_1	0	1	0	0
8005_1	1	0	0	1
8005_1	0	1	0	0
8005_1	0	0	0	1
8005_1	0	1	0	0
8006_1	0	1	0	0
8006_1	0	1	1	0
8006_1	0	0	1	0
8006_1	0	0	1	0
8006_1	0	0	1	0
8006_1	0	0	1	1
8006_1	0	0	0	1
8006_1	0	0	0	1
8006_1	0	0	1	0
8006_1	1	1	1	0
8006_1	0	0	0	1
8006_1	0	1	0	0
8006_1	0	0	1	0
8006_1	0	0	1	0
8006_1	0	0	1	0
8006_1	0	0	1	1
8006_1	0	0	1	0
8006_1	0	0	1	0
8006_1	0	1	0	0
8006_1	0	0	1	0
8006_1	0	0	1	0
8008_1	0	1	0	1
8008_1	0	1	1	1
8008_1	0	1	1	0
8008_1	0	1	1	1
8008_1	1	1	1	0
8008_1	0	0	1	0
8008_1	0	1	0	0
8008_1	0	0	0	1
8008_1	1	1	0	0
8008_1	0	0	1	0
8008_1	0	0	0	1
8009_1	0	0	1	0
8009_1	1	1	0	0
8009_1	0	0	1	0
8009_1	0	1	0	0
8009_1	0	1	0	0
8009_1	0	0	0	1
8009_1	0	1	0	0
8009_1	0	0	0	1
8009_1	0	1	0	0
8009_1	0	0	0	1
8009_1	0	1	0	0
8009_1	1	1	0	0
8009_1	0	0	1	1
8013_1	0	0	1	0
8013_1	0	0	0	1
8013_1	1	0	0	0
8013_1	0	0	0	1
8013_1	1	0	0	0
8013_1	0	0	0	1
8013_1	0	1	0	0
8013_1	1	1	1	0
8013_1	1	0	0	0
8013_1	1	0	0	1
8013_1	1	1	0	0
8013_1	0	1	0	0
8013_1	0	1	0	0
8013_1	0	0	1	0
8013_1	0	1	1	0
8013_1	0	1	0	0
8013_1	0	0	1	0
8016_1	0	0	1	0
8016_1	0	0	1	1
8016_1	0	0	1	1
8016_1	0	0	0	1
8016_1	0	1	0	0
8016_1	0	0	0	1
8016_1	0	0	0	1
8019_1	1	0	0	0
8019_1	0	1	0	0
8019_1	0	0	0	1
8019_1	0	1	0	1
8019_1	1	0	0	0
8019_1	0	1	0	0
8019_1	0	1	1	1
8019_1	0	0	1	0
8019_1	0	0	1	0
8019_1	0	0	1	0
8019_1	0	1	0	0
8019_1	0	0	1	0
8020_1	0	0	1	1
8020_1	0	0	1	0
8020_1	0	1	0	1
8020_1	0	0	1	1
8020_1	1	0	0	1
8020_1	0	0	0	1
8020_1	1	0	1	0
8020_1	0	1	0	0
8020_1	1	0	0	1
8020_1	0	0	1	0
8020_1	0	0	0	1
8020_1	0	0	0	1
8025_1	0	1	0	1
8025_1	1	0	0	1
8025_1	0	1	0	0
8025_1	1	1	0	0
8025_1	0	1	0	1
8025_1	0	0	1	1
8025_1	1	0	1	1
8025_1	1	1	0	1
8025_1	0	0	1	1
8025_1	0	0	1	0
8025_1	0	1	0	1
8025_1	1	0	1	0
8025_1	1	1	0	1
8025_1	0	1	0	0
8029_1	0	0	0	1
8029_1	0	1	0	1
8029_1	0	0	1	1
8029_1	0	1	1	0
8029_1	0	0	0	1
8029_1	0	1	0	0
8033_1	0	1	0	0
8033_1	1	0	0	0
8033_1	1	0	0	0
8033_1	1	1	0	0
8033_1	0	1	1	1
8033_1	0	0	1	1
8033_1	0	0	0	1
8033_1	0	0	0	1
8033_1	0	0	0	1
8033_1	0	0	0	1
8033_1	0	0	0	1
8033_1	1	0	0	0
8033_1	0	0	0	1
8033_1	0	1	0	0
8036_1	0	0	1	0
8036_1	0	0	0	1
8036_1	1	1	0	0
8036_1	1	1	0	0
8036_1	0	0	1	0
8036_1	0	1	0	0
8036_1	0	1	0	0
8036_1	0	0	0	1
8036_1	0	1	0	0
8037_1	0	0	1	0
8037_1	0	0	0	1
8037_1	0	0	1	1
8037_1	0	0	0	1
8037_1	0	0	1	0
8037_1	0	1	0	0
8040_1	1	1	1	0
8040_1	0	1	0	0
8040_1	0	1	0	0
8040_1	0	1	0	1
8040_1	1	0	0	1
8040_1	0	0	1	0
8040_1	0	1	0	1
8040_1	0	1	1	0
8040_1	0	0	1	0
8040_1	0	0	0	1
8040_1	0	0	1	0
8041_1	0	0	1	1
8041_1	0	0	0	1
8041_1	0	0	0	1
8041_1	0	0	1	0
8041_1	1	1	0	0
8041_1	0	0	1	1
8041_1	0	0	0	1
8041_1	0	0	0	1
8041_1	1	0	0	0
8041_1	0	0	1	1
8041_1	0	1	1	0
8041_1	0	0	0	1
8041_1	0	1	0	0
8041_1	0	0	1	0
8041_1	0	0	0	1
8041_1	0	1	0	0
8041_1	0	0	0	1
8041_1	0	0	0	1
8046_1	0	0	0	1
8046_1	0	0	1	0
8046_1	0	0	1	0
8046_1	0	1	0	0
8046_1	0	0	1	0
8046_1	0	0	0	1
8046_1	1	0	0	0
8046_1	1	1	0	0
8046_1	0	1	0	0
8046_1	0	1	0	0
8046_1	0	1	0	0
8046_1	0	1	0	0
8046_1	0	1	0	0
10120_1	0	0	1	1
10120_1	0	0	1	1
10120_1	0	1	0	0
10120_1	0	1	0	1
10120_1	0	0	1	0
10120_1	0	0	1	0
10120_1	0	0	0	1
10120_1	1	0	0	0
10120_1	0	1	0	0
10120_1	1	0	0	0
10120_1	0	1	0	1
10120_1	0	0	0	1
10120_1	1	0	0	0
10120_1	1	0	0	0
10120_1	0	1	0	0
10120_1	0	0	1	0
10120_1	0	0	1	0
10120_1	1	0	0	0
10120_1	0	0	0	1
10121_1	0	0	0	1
10121_1	1	0	0	0
10121_1	1	1	0	0
10121_1	1	0	1	0
10121_1	1	0	0	0
10121_1	0	0	0	1
10121_1	1	0	0	0
10121_1	1	0	0	0
10121_1	1	0	0	0
10121_1	1	0	0	0
10121_1	1	0	0	0
10122_1	1	0	0	0
10122_1	1	0	0	0
10122_1	0	1	0	0
10122_1	0	1	0	0
10122_1	0	1	1	0
10122_1	0	1	1	0
10122_1	0	0	1	0
10122_1	0	0	1	1
10122_1	0	0	1	0
10122_1	0	0	1	0
10122_1	0	0	0	1
10122_1	0	0	1	0
10122_1	0	0	1	0
10123_1	0	0	0	1
10123_1	0	0	0	1
10123_1	0	0	0	1
10123_1	0	0	0	1
10124_1	1	1	0	1
10124_1	1	0	0	1
10124_1	0	0	0	1
10124_1	0	1	0	0
10124_1	1	1	0	0
10124_1	0	0	1	0
10124_1	0	0	1	0
10125_1	0	0	1	1
10125_1	0	1	0	0
10125_1	1	0	0	0
10125_1	1	0	0	0
10126_1	1	0	0	0
10126_1	1	0	1	1
10126_1	0	1	0	0
10126_1	1	0	0	0
10126_1	0	1	1	1
10126_1	0	0	0	1
10126_1	1	0	0	0
10126_1	0	0	1	1
10126_1	0	0	0	1
10126_1	0	1	0	0
10126_1	0	1	0	0
10126_1	0	1	0	0
10126_1	1	0	0	0
10127_1	0	0	0	1
10127_1	0	0	1	1
10127_1	0	1	0	0
10127_1	0	0	1	0
10127_1	0	0	0	1
10127_1	1	1	0	0
10127_1	1	0	0	0
10127_1	1	0	0	0
10127_1	0	1	0	0
10128_1	1	0	0	0
10128_1	0	1	1	0
10128_1	0	0	1	1
10128_1	0	1	1	0
10128_1	0	0	0	1
10129_1	1	1	0	0
10129_1	1	0	0	0
10129_1	1	1	0	1
10129_1	0	0	1	0
10129_1	0	0	0	1
10129_1	0	1	0	1
1102_2	0	0	0	1
1102_2	1	0	0	0
1102_2	0	1	0	0
1102_2	0	0	1	0
1102_2	1	0	0	0
1102_2	0	1	1	0
1102_2	0	1	0	0
1103_2	0	0	1	0
1103_2	0	0	0	1
1103_2	0	0	1	0
1103_2	0	0	0	1
1103_2	0	0	0	1
1103_2	0	0	0	1
1113_2	1	0	0	0
1113_2	0	1	0	0
1113_2	1	0	0	0
1113_2	0	0	1	1
1113_2	1	1	0	0
1113_2	0	0	0	1
1113_2	0	0	0	1
1118_2	1	1	0	0
1118_2	1	0	0	1
1118_2	1	1	0	1
1118_2	0	1	0	0
1118_2	0	1	1	0
1118_2	0	0	1	0
1118_2	0	0	1	1
1154_2	0	0	0	1
1154_2	0	0	0	1
1154_2	0	0	0	1
1154_2	0	0	1	0
1154_2	0	1	0	0
1154_2	1	0	0	0
1154_2	1	1	1	0
1154_2	0	1	0	0
1154_2	0	0	1	0
1154_2	0	0	1	0
1154_2	0	0	1	0
1156_2	0	0	0	1
1156_2	0	0	1	0
1156_2	1	0	0	0
1162_2	0	0	0	1
1162_2	0	0	0	1
1162_2	1	0	0	0
1162_2	1	1	0	1
1162_2	0	0	0	1
1162_2	0	1	0	1
1162_2	0	1	0	0
1162_2	0	0	0	1
1162_2	0	0	0	1
1162_2	0	1	0	0
1162_2	0	0	0	1
1167_2	1	0	0	1
1175_2	1	0	0	0
1175_2	1	0	0	0
1175_2	0	1	1	1
1175_2	0	1	1	0
1175_2	0	0	1	0
1175_2	0	0	1	0
1175_2	0	0	1	1
1175_2	0	0	0	1
1177_2	1	1	1	0
1177_2	0	0	1	0
1177_2	0	0	0	1
1177_2	0	1	0	0
1184_2	0	0	1	0
1184_2	0	1	0	0
1184_2	0	0	1	0
1184_2	0	0	0	1
1188_2	0	1	0	1
1188_2	0	1	0	0
1189_2	1	1	0	1
1189_2	1	1	0	1
1189_2	0	1	0	0
1189_2	0	1	1	0
1189_2	0	1	0	0
2216_2	0	1	0	0
2216_2	0	1	1	0
2216_2	0	0	1	0
2216_2	1	0	0	0
2216_2	1	1	0	0
2217_2	1	1	0	0
2217_2	1	0	0	0
2217_2	0	1	0	0
2217_2	0	1	0	0
2217_2	0	0	0	1
2217_2	1	0	0	0
2217_2	1	0	0	0
2217_2	0	0	1	0
2217_2	0	0	1	0
2217_2	0	0	0	1
2217_2	0	0	0	1
2217_2	0	0	0	1
2225_2	0	1	0	0
2225_2	1	1	1	0
2225_2	0	0	1	0
2225_2	0	0	0	1
2234_2	1	1	1	0
2234_2	1	0	0	0
2244_2	1	0	0	0
2244_2	1	0	1	1
2244_2	1	0	1	0
2244_2	1	0	0	0
2244_2	1	0	0	0
2244_2	0	0	1	0
2244_2	0	0	0	1
2244_2	0	0	0	1
2244_2	0	0	0	1
2244_2	0	0	1	0
2244_2	0	0	1	0
2249_2	0	0	0	1
2249_2	1	1	0	0
2249_2	1	0	0	0
2249_2	1	0	0	1
2252_2	0	1	0	0
2252_2	1	0	0	0
2252_2	0	1	0	0
5101_2	1	0	0	0
5101_2	0	0	0	1
5101_2	1	1	0	0
5101_2	0	0	1	1
5104_2	1	0	0	0
5104_2	0	0	0	1
5104_2	0	0	1	0
5104_2	1	0	0	0
5104_2	1	1	0	1
5104_2	0	0	0	1
5104_2	0	0	0	1
5106_2	1	1	0	0
5106_2	1	0	0	0
5106_2	0	1	0	0
5106_2	0	1	0	0
5121_2	1	1	1	0
5121_2	1	1	1	0
5121_2	0	0	1	0
5121_2	0	0	0	1
5123_2	0	1	1	0
5123_2	0	0	0	1
5123_2	1	1	0	0
5123_2	1	0	0	0
5123_2	0	1	1	0
5123_2	0	1	0	0
5123_2	0	0	0	1
5121_2	0	0	0	1
5155_2	1	0	0	0
5155_2	1	0	1	0
5155_2	0	1	0	0
5155_2	0	1	0	0
5155_2	0	1	0	0
5155_2	0	0	1	1
5155_2	0	0	1	0
5155_2	0	0	0	1
5155_2	0	0	0	1
5200_2	0	0	1	1
5200_2	1	0	0	0
5232_2	0	0	1	0
5232_2	0	1	0	0
5232_2	0	1	0	0
8001_2	1	1	0	0
8001_2	0	1	0	0
8001_2	0	0	0	1
8006_2	0	0	0	1
8006_2	1	0	0	0
8006_2	1	0	0	0
8006_2	1	0	0	0
8006_2	1	0	0	0
8006_2	0	1	1	0
8006_2	0	1	0	0
8006_2	0	1	0	0
8006_2	0	0	1	1
8006_2	1	0	0	0
8006_2	1	1	0	0
8006_2	1	1	1	0
8006_2	0	0	0	1
8006_2	0	0	0	1
8007_2	0	0	1	0
8007_2	0	0	1	0
8007_2	1	0	0	0
8007_2	1	0	0	0
8007_2	0	0	1	0
8008_2	1	0	0	0
8008_2	1	0	0	0
8008_2	1	0	0	0
8008_2	0	1	0	0
8008_2	0	0	0	1
8008_2	0	0	0	1
8008_2	1	0	0	0
8008_2	1	0	0	0
8008_2	0	0	1	1
8011_2	0	0	0	1
8011_2	0	0	0	1
8011_2	0	0	0	1
8011_2	0	0	0	1
8011_2	0	1	1	1
8011_2	1	1	1	0
8011_2	0	0	1	1
8011_2	0	0	1	0
8011_2	1	0	0	0
8011_2	1	1	1	1
8011_2	1	0	0	0
8011_2	0	1	0	1
8011_2	0	1	1	0
8011_2	0	0	1	1
8011_2	0	0	1	0
8015_2	0	0	0	1
8015_2	0	0	0	1
8015_2	0	0	0	1
8015_2	1	0	0	0
8015_2	0	0	1	0
8015_2	0	1	0	0
8015_2	1	0	0	1
8015_2	1	0	0	0
8015_2	0	0	1	0
8030_2	1	0	0	1
8030_2	1	0	0	0
8030_2	1	0	0	0
8030_2	1	1	0	0
8030_2	1	0	0	0
8032_2	0	1	0	0
8032_2	1	1	0	1
8032_2	1	0	0	0
8032_2	0	1	0	0
8032_2	0	1	0	0
8032_2	0	0	1	0
8032_2	0	0	1	0
8032_2	0	0	1	0
8032_2	0	0	0	1
8032_2	1	1	0	0
8032_2	1	0	0	0
8032_2	0	0	0	1
8032_2	0	1	0	0
8034_2	0	0	1	0
8034_2	1	0	0	1
8034_2	0	0	0	1
8036_2	1	0	0	1
8036_2	1	0	0	0
8036_2	1	0	1	1
8036_2	1	0	0	0
8042_2	0	0	0	1
8042_2	0	0	0	1
8042_2	0	0	0	1
8042_2	1	0	0	0
8042_2	1	0	0	0
8042_2	1	0	0	0
8042_2	1	0	1	0
8042_2	0	1	0	1
8051_2	1	1	1	0
8051_2	0	1	0	0
8051_2	0	1	0	0
8051_2	0	1	0	1
8051_2	0	0	1	1
10120_2	1	0	0	0
10120_2	0	1	0	0
10120_2	0	1	0	0
10120_2	1	0	0	0
10120_2	1	0	0	0
10120_2	0	1	1	0
10120_2	0	0	1	1
10120_2	0	0	0	1
10120_2	0	0	0	1
10120_2	0	0	0	1
10121_2	1	0	0	0
10121_2	1	0	0	0
10121_2	0	1	0	0
10121_2	1	0	0	0
10121_2	0	1	0	0
10121_2	0	1	0	1
10121_2	0	0	1	0
10121_2	0	0	0	1
10121_2	0	0	0	1
10121_2	0	0	0	1
10121_2	0	1	0	0
10122_2	1	0	0	0
10122_2	0	0	1	0
10122_2	0	0	0	1
10122_2	0	0	0	1
10123_2	1	0	0	0
10123_2	1	0	1	1
10123_2	0	0	1	0
10123_2	0	0	0	1
10124_2	0	0	0	1
10124_2	0	0	0	1
10124_2	0	0	0	1
10124_2	0	0	0	1
10124_2	0	0	0	1
10124_2	0	0	0	1
10124_2	1	1	0	0
10124_2	1	0	0	0
10124_2	0	0	1	0
10124_2	0	0	1	1
10124_2	1	0	0	0
10124_2	1	0	1	0
10124_2	0	1	0	0
10124_2	0	0	1	0
10124_2	0	0	1	1
10125_2	0	0	1	0
10125_2	0	0	1	1
10125_2	0	0	1	1
10126_2	1	1	0	0
10126_2	1	0	0	0
10126_2	0	1	0	0
10126_2	1	1	0	1
10127_2	1	0	0	1
10127_2	0	1	0	1
10128_2	1	1	0	1
10128_2	1	0	0	0
10128_2	0	1	0	0
10128_2	0	1	0	1
10129_2	0	1	0	0
10129_2	0	1	1	0
10129_2	0	0	1	0
10129_2	0	0	1	0
10129_2	0	0	1	0
10129_2	1	0	0	0
10129_2	0	0	0	1
10129_2	0	0	0	1

## Sheet: yDat TADO
Capture data for TADO used to calculate abundance in R; intervals indicate night of trapping
Each row represents one midden location surveyed in one year (2011 = "_1' or 2012 = "_2"), with capture information for TADO (0 = not detected, 1 = detected on each of 4 trapping days). Details of small mammal trapping methods may be found in the Methods section of the corresponding manuscript.
Location ID	interval1	interval2	interval3	interval4
1104_1	0	0	1	0
1104_1	0	0	1	1
1104_1	0	0	1	0
1104_1	1	0	0	0
1104_1	0	1	0	0
1104_1	1	0	0	0
1104_1	0	1	1	0
1104_1	0	0	1	0
1104_1	0	1	0	0
1104_1	0	1	0	0
1104_1	0	0	0	1
1104_1	0	0	0	1
1106_1	1	0	0	0
1106_1	0	1	0	0
1106_1	0	0	1	0
1106_1	0	0	0	1
1106_1	1	0	0	0
1116_1	0	1	0	0
1118_1	0	0	0	1
1118_1	0	1	0	0
1118_1	0	0	0	1
1118_1	0	0	0	1
1118_1	0	0	0	1
1118_1	1	0	0	0
1118_1	0	0	1	1
1118_1	0	0	1	0
1118_1	0	0	1	0
1147_1	0	0	1	0
1147_1	0	0	1	0
1147_1	0	0	0	1
1147_1	0	0	1	0
1147_1	0	0	0	1
1149_1	0	0	0	1
1149_1	0	1	0	0
1149_1	0	1	0	0
1149_1	0	0	1	0
1149_1	0	1	0	0
1149_1	0	1	0	0
1153_1	0	0	0	1
1153_1	1	0	0	0
1153_1	1	0	0	0
1153_1	1	0	0	1
1153_1	0	0	1	1
1153_1	1	0	0	0
1153_1	1	1	1	0
1153_1	1	0	0	0
1153_1	0	0	1	0
1153_1	1	0	0	0
1153_1	0	1	0	0
1153_1	0	0	1	0
1153_1	0	0	1	0
1156_1	0	0	0	1
1156_1	0	1	0	0
1156_1	0	0	0	1
1156_1	0	0	0	1
1156_1	1	0	0	0
1156_1	0	0	1	0
1156_1	0	0	1	0
1156_1	0	1	0	0
1168_1	1	1	0	0
1168_1	0	0	1	0
1168_1	0	0	0	1
1168_1	1	0	0	0
1168_1	0	1	0	0
1168_1	1	0	0	0
1168_1	1	1	0	0
1170_1	1	0	1	1
1170_1	0	0	0	1
1170_1	1	0	0	0
1179_1	1	1	0	0
1179_1	0	0	1	0
1179_1	0	1	0	0
1179_1	1	0	0	0
1179_1	0	1	0	0
1179_1	0	1	0	0
1182_1	0	1	0	0
1182_1	0	1	0	0
1182_1	0	1	0	0
1182_1	0	0	0	1
1182_1	0	1	0	0
2201_1	0	0	1	0
2205_1	0	0	0	0
2206_1	0	1	0	0
2206_1	1	0	0	0
2206_1	0	0	1	0
2206_1	0	0	1	0
2208_1	0	1	0	0
2208_1	1	1	0	0
2218_1	0	0	0	1
2218_1	1	0	0	1
2241_1	0	0	0	1
5101_1	1	0	0	0
5101_1	0	1	0	0
5101_1	0	1	0	0
5101_1	0	1	0	0
5101_1	0	1	0	0
5119_1	1	0	0	0
5125_1	0	0	0	1
5125_1	0	0	0	1
5125_1	0	0	1	1
5150_1	1	0	0	0
5150_1	0	0	1	0
5150_1	1	0	0	0
5155_1	1	0	0	0
5155_1	1	0	0	0
5155_1	1	0	0	0
5155_1	0	0	1	0
5155_1	0	1	0	0
5155_1	1	0	0	0
8002_1	1	0	0	0
8002_1	1	0	0	0
8002_1	0	1	0	0
8002_1	0	1	0	0
8005_1	1	0	0	0
8005_1	1	0	0	0
8005_1	1	0	0	0
8005_1	0	1	1	0
8005_1	0	0	0	1
8005_1	1	0	0	0
8006_1	0	0	1	0
8006_1	0	0	0	1
8008_1	0	1	0	1
8008_1	0	1	0	0
8008_1	1	0	0	0
8008_1	1	0	0	0
8008_1	0	1	0	0
8008_1	0	0	0	1
8009_1	0	1	0	0
8009_1	1	0	0	0
8009_1	1	0	0	0
8009_1	0	0	0	1
8009_1	0	0	1	0
8009_1	1	0	0	0
8013_1	0	0	1	0
8013_1	0	0	0	1
8013_1	0	0	0	1
8013_1	0	0	0	1
8013_1	0	0	0	1
8016_1	0	0	1	0
8016_1	0	0	1	0
8019_1	0	0	1	0
8019_1	0	0	0	1
8019_1	1	0	0	1
8019_1	0	0	0	1
8019_1	1	0	0	0
8019_1	0	1	0	0
8020_1	0	0	1	1
8020_1	0	0	0	1
8020_1	0	1	0	0
8025_1	0	0	0	1
8025_1	0	1	0	1
8025_1	0	0	0	1
8025_1	1	1	0	1
8025_1	0	0	0	1
8025_1	0	1	0	1
8029_1	0	0	0	1
8033_1	0	0	0	1
8033_1	1	1	0	1
8033_1	1	0	1	0
8033_1	0	1	0	0
8033_1	0	1	0	0
8033_1	0	1	0	0
8033_1	0	0	0	1
8033_1	0	0	0	1
8033_1	0	0	0	1
8033_1	1	0	0	0
8033_1	0	1	0	0
8033_1	0	0	0	1
8033_1	1	0	0	0
8036_1	0	0	0	1
8037_1	1	1	0	0
8037_1	0	1	0	0
8037_1	0	1	0	0
8040_1	1	0	0	0
8040_1	0	1	0	1
8040_1	0	0	1	0
8041_1	0	0	0	1
8041_1	0	0	1	0
8041_1	0	1	0	0
8046_1	0	1	0	1
10120_1	0	0	0	1
10120_1	0	0	0	1
10120_1	1	0	1	0
10120_1	1	0	0	0
10121_1	0	0	0	1
10121_1	0	0	1	0
10122_1	0	0	1	0
10122_1	0	1	0	0
10122_1	1	0	0	0
10123_1	1	0	0	0
10123_1	0	1	0	0
10123_1	0	0	0	1
10123_1	0	0	0	1
10123_1	0	0	0	1
10123_1	0	1	0	0
10124_1	0	1	0	0
10124_1	0	1	0	0
10125_1	0	0	0	1
10126_1	1	0	0	0
10126_1	1	0	0	0
10126_1	1	0	0	1
10126_1	0	0	1	1
10127_1	1	0	0	0
10127_1	0	1	0	0
10128_1	0	0	0	0
10129_1	0	0	0	1
1102_2	0	0	1	0
1103_2	0	0	0	1
1113_2	0	1	1	0
1113_2	1	0	0	0
1113_2	0	0	0	1
1113_2	1	0	0	0
1113_2	0	0	1	0
1113_2	0	0	1	0
1113_2	0	0	1	0
1113_2	0	0	0	1
1113_2	0	0	0	1
1118_2	0	1	0	0
1118_2	1	0	0	0
1118_2	0	1	1	0
1118_2	0	1	0	0
1118_2	0	1	0	0
1118_2	0	0	0	1
1118_2	0	0	0	1
1118_2	0	0	0	1
1118_2	1	0	0	0
1154_2	0	0	0	1
1154_2	0	0	0	1
1154_2	0	0	0	1
1154_2	0	0	0	1
1154_2	0	0	0	1
1154_2	0	1	0	0
1154_2	1	0	0	0
1154_2	0	0	0	1
1154_2	0	0	1	0
1154_2	0	0	1	0
1154_2	0	1	0	0
1154_2	0	1	0	1
1154_2	0	0	0	1
1154_2	1	0	0	0
1154_2	0	1	0	0
1154_2	0	1	0	0
1154_2	0	1	0	0
1154_2	0	1	0	1
1154_2	0	0	1	0
1154_2	0	0	1	0
1156_2	0	0	0	1
1162_2	0	0	1	0
1162_2	0	0	0	1
1162_2	0	0	0	1
1162_2	0	0	0	1
1162_2	0	0	0	1
1162_2	0	0	0	1
1162_2	0	0	0	1
1167_2	0	0	0	1
1167_2	0	0	1	0
1175_2	1	0	1	1
1175_2	0	0	0	1
1175_2	1	0	0	1
1175_2	1	0	0	0
1175_2	1	0	1	0
1175_2	0	1	0	0
1175_2	0	1	0	0
1175_2	0	0	0	1
1175_2	0	0	0	1
1177_2	1	0	1	0
1177_2	1	0	0	0
1177_2	1	1	0	0
1177_2	0	1	0	0
1177_2	0	1	0	0
1177_2	0	1	0	0
1177_2	0	0	1	0
1177_2	0	0	1	1
1184_2	0	1	0	0
1184_2	0	1	0	0
1184_2	0	0	0	1
1188_2	0	0	0	1
1188_2	1	0	1	0
1188_2	1	0	1	0
1188_2	1	0	0	0
1188_2	0	1	0	1
1188_2	0	0	1	0
1189_2	1	0	0	0
1189_2	0	0	1	0
1189_2	0	0	0	1
2216_1	0	0	0	0
2217_2	1	0	0	0
2217_2	1	0	0	0
2217_2	0	0	1	0
2217_2	0	0	0	1
2225_2	0	0	0	0
2234_2	1	0	0	0
2234_2	0	0	1	0
2244_2	0	0	1	0
2249_2	1	0	0	0
2252_2	1	0	0	0
5101_2	0	0	0	1
5104_2	1	0	0	0
5104_2	1	0	0	0
5104_2	0	0	1	0
5104_2	0	0	0	1
5106_2	1	0	0	0
5106_2	0	0	1	0
5121_2	1	0	0	0
5121_2	0	0	0	1
5121_2	0	1	0	0
5121_2	0	1	0	0
5121_2	0	0	1	0
5121_2	0	0	0	1
5123_2	0	0	1	0
5123_2	0	0	1	0
5123_2	0	0	1	0
5123_2	0	0	0	1
5123_2	0	0	1	0
5123_2	0	0	0	1
5123_2	0	1	0	0
5123_2	1	0	0	1
5123_2	0	0	0	1
5155_2	0	0	1	0
5155_2	0	1	0	0
5155_2	0	0	1	0
5155_2	0	0	0	1
5155_2	0	0	0	1
5200_2	1	0	0	0
5200_2	0	0	1	0
5200_2	0	0	1	0
5200_2	1	0	0	0
5200_2	0	0	1	0
5200_2	0	1	0	0
5200_2	0	0	1	0
5200_2	0	0	1	0
5200_2	0	0	0	1
5200_2	0	0	0	1
5232_2	0	0	0	0
8001_2	0	0	0	1
8001_2	0	0	0	1
8006_2	1	0	1	0
8006_2	1	0	0	0
8006_2	1	0	0	0
8006_2	0	0	0	1
8006_2	0	0	0	1
8007_2	0	0	1	0
8007_2	0	0	0	1
8007_2	0	1	0	0
8008_2	0	1	0	0
8008_2	0	1	0	1
8008_2	0	1	0	0
8008_2	0	0	0	1
8008_2	0	0	0	1
8008_2	0	0	0	1
8008_2	0	1	0	0
8008_2	0	0	0	1
8008_2	1	0	0	0
8008_2	0	0	0	1
8011_2	0	0	0	1
8011_2	0	0	0	1
8011_2	0	0	0	1
8011_2	1	0	0	0
8011_2	0	0	0	1
8011_2	1	0	0	1
8011_2	0	0	1	0
8011_2	0	0	0	1
8015_2	0	0	1	0
8015_2	0	0	0	1
8030_2	0	0	0	1
8032_2	0	0	0	1
8032_2	0	0	1	0
8032_2	0	1	0	1
8032_2	0	1	0	0
8032_2	0	1	0	0
8032_2	0	0	1	1
8032_2	0	0	0	1
8032_2	0	0	0	1
8032_2	0	0	0	1
8034_2	0	0	0	0
8036_2	0	1	0	0
8042_2	0	0	0	1
8042_2	0	1	0	1
8042_2	0	0	1	0
8051_2	1	0	0	0
10120_2	0	0	1	0
10120_2	1	1	0	0
10120_2	0	0	1	1
10121_2	1	0	0	0
10122_2	0	0	0	0
10123_2	0	0	0	0
10124_2	0	0	1	0
10124_2	0	1	0	0
10125_2	0	1	0	0
10126_2	1	0	0	0
10126_2	1	0	0	0
10126_2	0	1	0	0
10126_2	0	0	1	1
10126_2	1	0	0	0
10126_2	1	0	0	0
10126_2	0	0	0	1
10126_2	0	0	0	1
10126_2	0	0	1	0
10127_2	1	0	0	0
10127_2	1	0	0	0
10127_2	1	0	0	1
10127_2	0	1	0	0
10127_2	0	0	1	0
10127_2	1	0	0	0
10127_2	1	0	0	0
10128_2	0	0	0	0
10129_2	0	0	0	1
10129_2	0	0	0	1

## Sheet: AMRO
Detection data of AMRO from point counts used to calculate abundance in R; columns indicate distances in meters
Each row represents one midden location surveyed in one year (2011 = "_1' or 2012 = "_2"), with detection information for AMRO (number of birds detected in each distance class of 0-10m, 10-20m, 20-30m, 30-50m, 50-100m). Details of bird survey methods may be found in the Methods section of the corresponding manuscript.
Location ID	X10	X20	X30	X50	X100
1104_1	0	0	0	0	0
1106_1	0	0	0	0	0
1116_1	0	0	0	0	0
1118_1	0	0	0	0	0
1147_1	0	0	0	0	0
1149_1	0	0	0	0	0
1153_1	0	0	0	0	0
1156_1	0	0	0	0	0
1168_1	0	0	0	0	0
1170_1	0	0	0	0	0
1179_1	0	0	0	0	0
1182_1	0	0	0	0	0
2202_1	0	0	0	0	0
2205_1	0	0	0	0	0
2206_1	0	0	0	0	0
2208_1	0	0	0	0	0
2218_1	0	0	0	0	0
2241_1	0	0	0	0	0
5101_1	0	0	0	0	0
5119_1	0	0	0	0	0
5125_1	0	0	0	0	0
5150_1	0	0	0	1	0
5155_1	0	0	0	0	0
8002_1	0	0	0	2	0
8005_1	0	0	0	1	0
8006_1	0	0	0	0	0
8008_1	0	0	0	0	0
8009_1	0	0	0	0	0
8013_1	0	0	0	0	0
8016_1	0	0	0	0	0
8019_1	0	0	0	0	0
8020_1	0	0	0	0	0
8025_1	0	0	0	0	0
8029_1	0	0	0	0	0
8033_1	0	0	0	0	0
8036_1	0	0	0	0	0
8037_1	0	0	0	0	0
8040_1	0	0	1	0	0
8041_1	0	0	0	0	0
8046_1	0	0	0	0	0
10120_1	0	0	0	0	0
10121_1	0	0	0	0	0
10122_1	0	0	0	0	0
10123_1	0	0	0	1	1
10124_1	0	0	0	2	0
10125_1	0	0	0	0	0
10126_1	0	0	0	0	0
10127_1	0	0	0	0	0
10128_1	0	0	0	0	0
10129_1	0	0	0	0	0
1102_2	0	0	0	0	0
1103_2	0	0	0	0	0
1113_2	0	0	0	0	0
1118_2	1	0	0	2	0
1154_2	0	0	0	0	0
1156_2	0	1	1	0	1
1162_2	0	0	0	0	0
1167_2	0	0	1	1	1
1175_2	0	0	1	4	0
1177_2	0	0	0	3	0
1184_2	0	0	0	0	0
1188_2	0	0	0	1	0
1189_2	0	0	0	0	0
2216_2	0	0	0	1	0
2217_2	0	0	0	0	0
2225_2	0	0	0	0	0
2234_2	0	0	0	1	0
2244_2	0	0	0	0	0
2249_2	0	0	0	1	0
2252_2	0	0	0	0	0
5101_2	0	0	0	1	0
5104_2	0	0	0	0	0
5106_2	0	0	0	0	0
5121_2	0	0	3	1	0
5123_2	0	0	0	0	2
5155_2	0	0	0	0	0
5200_2	0	0	0	0	3
5232_2	0	0	0	0	0
8001_2	0	0	0	0	2
8006_2	0	0	0	0	0
8007_2	0	0	0	0	0
8008_2	0	0	0	0	1
8011_2	0	0	0	0	0
8015_2	0	0	0	0	0
8030_2	0	0	0	2	2
8032_2	0	0	0	0	0
8034_2	0	0	0	1	0
8036_2	0	0	0	2	2
8042_2	0	0	0	0	0
8051_2	0	0	0	0	1
10120_2	0	0	0	0	0
10121_2	0	0	0	1	0
10122_2	0	1	0	1	1
10123_2	0	0	0	0	0
10124_2	0	0	0	0	0
10125_2	0	0	0	1	4
10126_2	0	0	0	0	1
10127_2	0	0	0	2	1
10128_2	0	0	0	0	1
10129_2	0	0	0	0	0

## Sheet: HETH
Detection data of HETH from point counts used to calculate abundance in R; columns indicate distances in meters
Each row represents one midden location surveyed in one year (2011 = "_1' or 2012 = "_2"), with detection information for HETH (number of birds detected in each distance class of 0-10m, 10-20m, 20-30m, 30-50m, 50-100m). Details of bird survey methods may be found in the Methods section of the corresponding manuscript.
Location ID	X10	X20	X30	X50	X100
1104_1	0	0	0	0	0
1106_1	0	0	0	0	0
1116_1	0	0	0	1	0
1118_1	0	0	0	0	1
1147_1	0	0	0	0	0
1149_1	0	0	0	1	1
1153_1	0	0	0	0	0
1156_1	0	0	0	2	2
1168_1	0	0	0	1	1
1170_1	0	0	0	1	1
1179_1	0	0	0	0	0
1182_1	0	0	0	0	0
2202_1	0	0	0	0	2
2205_1	0	0	0	0	0
2206_1	0	0	0	0	0
2208_1	0	0	0	0	1
2218_1	0	0	0	0	0
2241_1	0	0	0	0	0
5101_1	0	0	0	0	0
5119_1	0	0	0	0	0
5125_1	0	0	0	0	1
5150_1	0	1	0	0	3
5155_1	0	0	0	1	1
8002_1	0	0	0	0	2
8005_1	0	0	0	0	1
8006_1	0	0	0	0	1
8008_1	1	0	0	0	0
8009_1	0	0	0	0	0
8013_1	0	0	0	0	0
8016_1	0	0	0	0	0
8019_1	0	0	0	2	1
8020_1	0	0	0	0	0
8025_1	0	0	0	0	0
8029_1	0	0	0	1	1
8033_1	0	0	1	0	0
8036_1	0	0	0	0	3
8037_1	0	0	0	0	0
8040_1	0	0	0	0	0
8041_1	0	0	0	0	0
8046_1	1	0	0	0	0
10120_1	0	0	0	2	0
10121_1	0	0	0	0	0
10122_1	0	0	0	1	0
10123_1	0	0	0	0	1
10124_1	0	1	0	1	1
10125_1	0	0	0	0	0
10126_1	0	0	0	0	2
10127_1	0	0	0	0	0
10128_1	0	0	0	1	0
10129_1	0	0	0	1	0
1102_2	0	0	1	0	0
1103_2	0	0	1	0	0
1113_2	0	0	0	0	0
1118_2	0	0	0	1	2
1154_2	0	0	0	0	1
1156_2	0	0	0	0	2
1162_2	1	0	0	0	0
1167_2	0	0	0	0	2
1175_2	0	0	0	0	3
1177_2	0	1	1	1	2
1184_2	0	0	0	0	0
1188_2	1	0	0	1	1
1189_2	0	1	0	0	0
2216_2	0	0	0	0	2
2217_2	0	0	0	1	2
2225_2	1	0	0	2	0
2234_2	0	0	0	2	1
2244_2	0	0	0	2	0
2249_2	0	0	0	1	2
2252_2	0	0	0	0	1
5101_2	0	0	3	2	2
5104_2	0	0	0	0	0
5106_2	0	0	2	0	0
5121_2	0	0	0	0	3
5123_2	0	0	0	0	0
5155_2	0	0	0	0	0
5200_2	0	0	0	1	3
5232_2	0	0	1	1	2
8001_2	0	0	0	1	2
8006_2	0	0	0	1	3
8007_2	0	0	0	1	3
8008_2	0	0	0	3	1
8011_2	0	0	0	0	0
8015_2	0	0	0	0	0
8030_2	0	0	0	0	3
8032_2	0	0	0	1	0
8034_2	0	0	0	2	2
8036_2	0	0	0	3	2
8042_2	0	0	0	1	0
8051_2	0	0	0	1	1
10120_2	0	0	0	0	0
10121_2	0	0	0	1	1
10122_2	0	1	0	2	1
10123_2	0	0	0	1	0
10124_2	0	0	0	0	0
10125_2	0	0	0	0	1
10126_2	0	1	0	0	2
10127_2	0	0	0	1	2
10128_2	0	0	0	0	2
10129_2	0	0	0	0	0

## Sheet: YEJU
Detection data of YEJU from point counts used to calculate abundance in R; columns indicate distances in meters
Each row represents one midden location surveyed in one year (2011 = "_1' or 2012 = "_2"), with detection information for YEJU (number of birds detected in each distance class of 0-10m, 10-20m, 20-30m, 30-50m, 50-100m). Details of bird survey methods may be found in the Methods section of the corresponding manuscript.
Location ID	X10	X20	X30	X50	X100
1104_1	1	0	0	0	0
1106_1	2	2	0	0	0
1116_1	1	1	0	0	0
1118_1	3	1	0	0	0
1147_1	2	1	0	0	0
1149_1	1	0	1	2	2
1153_1	1	1	0	0	0
1156_1	2	0	0	0	0
1168_1	1	1	3	0	0
1170_1	0	1	1	0	0
1179_1	2	1	0	0	0
1182_1	2	1	1	0	0
2202_1	0	0	0	1	0
2205_1	0	1	1	0	0
2206_1	0	1	0	0	0
2208_1	5	0	0	0	0
2218_1	1	1	1	1	0
2241_1	0	1	1	0	0
5101_1	1	1	1	0	0
5119_1	0	0	1	0	0
5125_1	0	0	0	1	0
5150_1	0	1	0	2	0
5155_1	0	0	1	0	0
8002_1	0	0	0	0	0
8005_1	1	3	0	0	0
8006_1	2	0	0	0	0
8008_1	1	0	0	0	0
8009_1	2	0	0	0	0
8013_1	0	1	2	0	0
8016_1	0	0	0	0	0
8019_1	0	1	0	0	0
8020_1	0	0	1	0	0
8025_1	0	0	2	0	0
8029_1	0	0	0	0	0
8033_1	0	1	1	0	0
8036_1	0	0	0	0	1
8037_1	3	1	1	0	0
8040_1	0	0	0	1	0
8041_1	0	2	0	1	0
8046_1	3	1	0	0	0
10120_1	0	0	0	0	0
10121_1	0	0	1	1	0
10122_1	1	1	0	0	0
10123_1	0	1	1	0	0
10124_1	2	0	0	0	0
10125_1	0	1	3	1	1
10126_1	0	0	0	0	0
10127_1	2	1	0	1	0
10128_1	0	1	2	0	0
10129_1	1	2	0	0	0
1102_2	0	0	1	0	0
1103_2	1	1	3	0	0
1113_2	4	1	0	1	0
1118_2	0	0	0	0	1
1154_2	4	4	1	0	0
1156_2	0	0	1	0	0
1162_2	0	1	2	1	0
1167_2	1	0	1	0	0
1175_2	0	0	0	0	0
1177_2	0	1	0	0	0
1184_2	0	2	0	0	0
1188_2	0	3	0	0	0
1189_2	0	2	1	0	0
2216_2	0	0	1	0	0
2217_2	3	1	2	0	0
2225_2	1	2	3	1	0
2234_2	0	0	0	1	0
2244_2	2	2	0	0	0
2249_2	0	0	1	1	0
2252_2	0	0	1	1	0
5101_2	0	0	0	0	0
5104_2	0	0	0	0	0
5106_2	0	0	0	0	0
5121_2	0	0	0	0	0
5123_2	2	0	0	0	0
5155_2	1	1	1	1	0
5200_2	0	2	0	0	0
5232_2	0	0	1	1	0
8001_2	0	0	2	0	0
8006_2	2	1	0	0	0
8007_2	2	2	0	0	0
8008_2	1	1	0	0	0
8011_2	0	1	1	0	0
8015_2	0	3	3	0	0
8030_2	0	0	0	0	0
8032_2	0	0	1	1	0
8034_2	0	0	0	0	0
8036_2	0	0	0	0	0
8042_2	0	1	2	0	0
8051_2	1	1	0	1	0
10120_2	1	3	0	2	0
10121_2	3	2	0	0	0
10122_2	0	0	0	0	0
10123_2	0	0	1	1	0
10124_2	2	0	3	1	0
10125_2	2	0	3	0	0
10126_2	1	1	0	0	0
10127_2	2	0	0	0	1
10128_2	0	0	0	2	0
10129_2	0	1	4	1	0

## Sheet: STJA
Detection data of STJA from point counts used to calculate abundance in R; columns indicate distances in meters
Each row represents one midden location surveyed in one year (2011 = "_1' or 2012 = "_2"), with detection information for YEJU (number of birds detected in each distance class of 0-10m, 10-20m, 20-30m, 30-50m, 50-100m). Details of bird survey methods may be found in the Methods section of the corresponding manuscript.
Location ID	X10	X20	X30	X50	X100
1104_1	0	0	0	0	0
1106_1	0	0	0	0	0
1116_1	0	0	0	0	0
1118_1	0	0	0	0	0
1147_1	0	0	0	0	0
1149_1	0	0	0	0	0
1153_1	0	0	0	0	0
1156_1	0	0	0	0	0
1168_1	0	0	0	0	0
1170_1	0	0	0	0	0
1179_1	0	0	0	0	0
1182_1	0	0	0	0	0
2202_1	0	0	0	0	0
2205_1	0	0	0	0	0
2206_1	0	0	0	0	0
2208_1	0	0	0	0	0
2218_1	0	0	0	0	0
2241_1	0	0	0	0	0
5101_1	0	0	0	0	0
5119_1	0	0	0	0	0
5125_1	0	0	0	0	0
5150_1	0	0	0	0	0
5155_1	0	0	0	0	0
8002_1	0	0	0	0	0
8005_1	0	0	0	0	0
8006_1	0	0	0	1	0
8008_1	0	0	0	0	1
8009_1	0	0	0	0	0
8013_1	0	0	0	0	1
8016_1	0	0	0	0	0
8019_1	0	0	0	0	0
8020_1	0	0	0	0	0
8025_1	0	0	0	0	0
8029_1	0	0	0	0	0
8033_1	0	0	0	0	0
8036_1	0	0	0	0	0
8037_1	0	0	0	0	0
8040_1	0	0	0	0	1
8041_1	0	0	0	0	0
8046_1	0	0	0	0	0
10120_1	0	0	0	0	0
10121_1	0	0	0	0	0
10122_1	0	0	0	0	0
10123_1	0	0	0	0	0
10124_1	0	0	0	0	0
10125_1	0	0	0	0	0
10126_1	0	0	0	0	0
10127_1	0	0	0	0	0
10128_1	0	0	0	1	0
10129_1	0	0	0	0	0
1102_2	0	0	0	1	0
1103_2	0	0	0	0	0
1113_2	0	0	0	0	0
1118_2	0	0	0	0	0
1154_2	0	0	0	1	0
1156_2	0	0	0	0	0
1162_2	0	0	0	0	0
1167_2	0	0	0	0	0
1175_2	0	0	0	0	0
1177_2	0	0	0	0	0
1184_2	0	0	0	0	0
1188_2	0	0	0	0	0
1189_2	0	0	0	0	0
2216_2	0	0	0	0	0
2217_2	0	0	0	0	0
2225_2	0	0	0	0	0
2234_2	0	0	0	0	0
2244_2	0	0	0	0	0
2249_2	0	0	0	0	0
2252_2	0	0	0	0	0
5101_2	0	0	0	0	0
5104_2	0	0	0	0	0
5106_2	0	0	0	0	0
5121_2	0	0	0	0	0
5123_2	0	0	0	0	2
5155_2	0	0	0	1	0
5200_2	0	0	0	0	0
5232_2	0	0	0	0	0
8001_2	0	0	0	0	0
8006_2	0	0	1	1	0
8007_2	0	0	0	1	0
8008_2	0	0	0	0	0
8011_2	0	0	0	1	0
8015_2	0	0	0	0	0
8030_2	0	0	0	0	0
8032_2	0	0	1	0	0
8034_2	0	0	0	0	0
8036_2	0	0	0	0	0
8042_2	0	0	0	0	0
8051_2	0	0	0	0	0
10120_2	0	0	0	2	0
10121_2	0	0	0	1	0
10122_2	0	0	0	0	0
10123_2	0	0	0	0	0
10124_2	0	0	0	0	0
10125_2	0	0	0	0	0
10126_2	0	0	0	0	0
10127_2	0	0	0	0	0
10128_2	0	0	0	0	0
10129_2	0	0	0	0	1

## Sheet: Presence of Spp
Species detected (1) or not detected (0) by small mammal trapping, camera trapping, or point counts at each location
Each row represents one midden location surveyed in one year (2011 = "_1' or 2012 = "_2"), with species presence information (0 = not detected, 1 = detected) for all species detected. Details of small mammal trapping, medium to large mammal camera surveys, and bird survey methods may be found in the Methods section of the corresponding manuscript.
Location ID	MILO	NEME	PEBO	PEMA	SOMO	TADO	ABSQ	BLBE	BOBC	GRFO	MOLI	ROSQ	STSK	WHDE	AMRO	HETH	STJA	YEJU
1104-1	1	1	0	1	1	1	0	0	0	0	0	1	1	0	0	0	0	1
1106-1	1	1	0	1	0	1	0	1	0	0	0	0	0	1	0	0	0	1
1116-1	0	1	0	1	0	1	0	1	0	0	0	0	0	1	0	1	0	1
1118-1	0	1	0	1	0	1	0	0	1	0	0	0	1	0	0	1	0	1
1147-1	0	1	1	1	0	1	0	0	0	0	0	0	0	0	0	0	0	1
1149-1	0	1	0	1	0	1	0	0	0	0	0	0	0	1	0	1	0	1
1153-1	0	0	0	1	1	1	0	0	0	0	0	0	0	0	0	0	0	1
1156-1	1	0	0	1	1	1	1	0	1	0	1	0	0	0	0	1	0	1
1168-1	1	1	0	1	1	1	0	0	0	0	0	0	1	1	0	1	0	1
1170-1	0	1	0	1	1	1	0	0	0	0	0	0	0	1	0	1	0	1
1179-1	1	0	0	1	1	1	0	1	0	0	0	0	0	0	0	0	0	1
1182-1	0	1	0	1	1	1	0	0	1	0	0	0	0	1	0	0	0	1
2202-1	0	0	1	1	0	1	0	0	0	0	0	0	0	0	0	1	0	1
2205-1	1	1	0	1	1	1	0	1	0	0	0	0	0	1	0	0	0	1
2206-1	1	1	0	1	1	1	0	1	0	1	0	0	0	0	0	0	0	1
2208-1	0	0	0	1	0	1	0	0	0	0	0	0	0	1	0	1	0	1
2218-1	1	0	0	1	0	1	0	1	0	0	0	0	1	1	0	0	0	1
2241-1	0	1	0	1	0	1	0	1	0	0	0	0	0	1	0	0	1	1
5101-1	0	1	0	1	1	1	0	1	0	0	0	0	0	1	0	0	0	1
5119-1	1	0	0	1	1	1	0	1	1	0	0	0	1	1	0	1	0	1
5125-1	0	0	1	1	1	1	0	0	1	0	0	1	0	0	0	1	0	1
5150-1	0	1	0	1	1	1	0	1	0	0	0	0	0	1	1	1	0	1
5155-1	0	1	0	1	0	1	0	0	0	0	0	0	0	1	0	1	0	1
8002-1	0	1	0	1	0	1	0	0	0	0	0	0	0	1	1	1	0	0
8005-1	0	0	1	1	0	1	0	0	0	0	0	0	1	0	1	1	0	1
8006-1	0	1	0	1	1	1	0	1	0	0	0	0	0	1	0	1	1	1
8008-1	0	1	0	1	0	1	1	1	0	1	0	1	1	0	0	1	1	1
8009-1	0	1	0	1	0	1	0	0	0	0	0	0	0	0	0	1	0	1
8013-1	0	1	0	1	1	1	0	0	0	0	0	0	1	0	0	0	1	1
8016-1	0	1	0	1	1	1	0	0	0	0	0	0	0	0	1	1	0	0
8019-1	1	1	1	1	1	1	0	0	0	0	0	0	0	1	0	1	0	1
8020-1	1	1	0	1	1	1	0	0	1	0	0	0	1	1	0	1	0	1
8025-1	0	0	0	1	1	1	0	0	0	0	0	0	0	1	0	0	0	1
8029-1	0	0	0	1	0	1	0	1	1	0	0	0	1	1	0	1	0	0
8033-1	1	1	0	1	1	1	0	0	0	0	0	0	1	1	0	1	0	1
8036-1	1	1	0	1	0	1	0	1	0	0	0	1	0	0	0	1	0	1
8037-1	0	1	1	1	0	1	1	0	0	0	0	0	1	0	0	0	0	1
8040-1	0	1	0	1	0	1	1	0	0	0	0	0	0	0	1	0	1	1
8041-1	0	1	0	1	1	1	0	1	0	0	0	0	0	1	0	1	0	1
8046-1	0	0	0	1	0	1	0	0	1	0	0	0	0	0	0	1	0	1
10120-1	1	0	0	1	0	1	0	0	0	0	0	0	0	1	0	1	0	0
10121-1	0	0	0	1	0	1	0	1	0	0	0	0	0	0	0	0	0	1
10122-1	0	1	0	1	0	1	1	0	0	0	0	0	0	1	0	1	0	1
10123-1	0	1	0	1	0	1	1	0	0	0	0	1	0	0	1	1	0	1
10124-1	0	0	0	1	0	1	0	0	0	0	0	0	0	1	1	1	0	1
10125-1	0	0	0	1	0	1	0	0	0	0	0	0	0	0	0	1	0	1
10126-1	0	1	0	1	0	1	0	0	0	0	0	0	0	0	0	1	0	0
10127-1	0	1	0	1	1	1	0	1	0	0	0	0	0	1	0	0	0	1
10128-1	1	0	0	1	0	1	0	0	0	0	0	1	0	0	0	1	1	1
10129-1	0	1	0	1	0	1	0	0	0	0	0	0	0	1	0	1	0	1
1102-2	0	0	0	1	1	1	0	0	0	0	0	0	0	0	0	1	1	1
1103-2	0	1	0	1	1	1	0	1	0	0	0	0	0	0	0	1	0	1
1113-2	0	0	0	1	0	1	0	0	0	0	0	0	0	0	0	0	0	1
1118-2	0	1	1	1	0	1	0	0	0	0	0	0	0	0	1	1	0	1
1154-2	0	1	0	1	1	1	0	1	0	0	0	0	0	1	0	1	1	1
1156-2	0	0	0	1	0	1	0	1	0	0	0	0	0	1	1	1	0	1
1162-2	0	1	0	1	1	1	0	1	0	0	0	0	0	1	0	1	0	1
1167-2	0	0	0	1	0	1	0	0	0	0	0	0	0	0	1	1	0	1
1175-2	0	1	0	1	0	1	0	0	0	0	0	0	0	0	1	1	0	0
1177-2	1	0	0	1	0	1	0	0	0	0	0	0	0	0	1	1	0	1
1184-2	1	0	0	1	1	1	0	0	0	0	0	0	0	1	0	0	0	1
1188-2	0	0	0	1	0	1	1	0	0	0	0	1	0	0	1	1	0	1
1189-2	1	1	0	1	1	1	1	1	0	0	0	0	0	1	0	1	0	1
2216-2	0	1	0	1	0	0	0	0	0	0	0	0	0	0	1	1	0	1
2217-2	0	1	0	1	0	1	0	0	0	0	0	0	1	1	0	1	0	1
2225-2	0	0	0	1	0	0	0	0	1	0	0	0	1	1	0	1	0	1
2234-2	0	1	0	1	0	1	0	0	0	0	0	0	1	1	1	1	0	1
2244-2	1	1	0	1	1	1	0	0	0	0	0	0	0	1	0	1	0	1
2249-2	0	0	0	1	0	1	0	0	0	0	0	0	1	1	1	1	0	1
2252-2	1	1	0	1	0	1	0	0	0	0	0	0	0	1	0	1	0	1
5101-2	0	0	0	1	0	1	0	1	0	0	0	0	1	1	1	1	0	0
5104-2	1	1	0	1	1	1	0	0	0	0	0	0	1	1	0	0	0	0
5106-2	0	1	0	1	0	1	0	0	0	0	0	0	0	1	1	1	0	0
5121-2	0	0	0	1	0	1	0	0	0	0	0	0	1	0	1	1	0	0
5123-2	1	1	0	1	0	1	0	0	1	0	0	0	0	1	1	1	1	1
5155-2	0	0	0	1	1	1	0	1	0	0	0	0	0	1	0	0	1	1
5200-2	1	0	0	1	0	1	0	0	0	1	0	1	1	0	1	1	0	1
5232-2	0	0	0	1	0	0	1	1	0	0	0	0	1	1	0	1	0	1
8001-2	0	1	0	1	0	1	0	0	0	0	0	0	0	0	1	1	0	1
8006-2	1	0	0	1	0	1	0	0	0	0	0	0	0	0	0	1	1	1
8007-2	0	1	0	1	1	1	0	0	1	0	0	0	0	0	1	1	1	1
8008-2	1	0	0	1	1	1	0	0	1	0	0	0	0	0	1	1	0	1
8011-2	0	1	0	1	1	1	0	0	0	0	0	0	1	0	0	0	1	1
8015-2	0	1	0	1	0	1	0	0	0	0	0	0	1	0	0	0	1	1
8030-2	0	1	0	1	1	1	0	1	0	0	0	0	0	1	1	1	0	0
8032-2	1	1	0	1	1	1	0	0	0	0	0	0	0	1	0	1	0	1
8034-2	0	1	0	1	0	0	0	0	0	0	1	0	0	1	1	1	1	0
8036-2	0	0	0	1	0	1	0	0	0	0	0	0	0	0	1	1	0	0
8042-2	0	1	0	1	1	1	0	0	0	0	0	0	0	0	0	1	0	1
8051-2	1	1	0	1	0	1	0	0	0	0	0	0	0	0	1	1	0	1
10120-2	1	0	0	1	1	1	0	0	0	1	0	0	1	1	0	0	1	1
10121-2	1	0	0	1	0	1	0	0	0	0	0	0	0	1	1	1	1	1
10122-2	0	0	0	1	0	0	0	0	0	0	0	0	1	1	1	1	0	0
10123-2	0	0	0	1	0	1	0	0	0	0	0	0	0	0	0	1	0	1
10124-2	1	0	0	1	1	1	0	0	0	0	0	0	0	0	0	0	0	1
10125-2	0	0	0	1	0	1	0	0	0	0	0	0	0	1	1	1	0	1
10126-2	0	1	0	1	0	1	0	0	0	0	0	0	0	0	1	1	1	1
10127-2	0	0	0	1	0	1	0	0	0	0	0	0	1	1	1	1	0	1
10128-2	1	1	0	1	0	0	0	0	0	0	0	1	0	0	1	1	0	1
10129-2	1	1	0	1	1	1	0	0	0	0	0	0	0	1	0	0	1	1

## Sheet: Species Richness
Number of species of mammals in two size classes and birds detected by small mammal trapping, camera trapping, or point counts at each location
Each row represents one midden location surveyed in one year (2011 = "_1' or 2012 = "_2"), with species richness calculated from the sum of species in each of three taxanomic groups.
Location ID	Small mammal richness	Medium-Lg Mammal Richness	Avian Richness
1104-1	5	2	4
1106-1	4	2	5
1116-1	3	2	5
1118-1	3	3	6
1147-1	4	1	4
1149-1	3	2	6
1153-1	3	0	2
1156-1	3	4	6
1168-1	5	2	5
1170-1	4	2	3
1179-1	4	1	7
1182-1	4	0	3
2202-1	3	0	4
2205-1	5	2	3
2206-1	5	2	2
2208-1	2	1	5
2218-1	3	3	3
2241-1	3	1	3
5101-1	4	2	4
5119-1	4	4	4
5125-1	4	1	4
5150-1	4	2	7
5155-1	3	1	7
8002-1	3	1	7
8005-1	3	1	5
8006-1	4	3	7
8008-1	3	5	6
8009-1	3	1	5
8013-1	4	2	5
8016-1	4	0	7
8019-1	6	1	4
8020-1	5	3	5
8025-1	3	1	6
8029-1	2	4	4
8033-1	5	2	6
8036-1	4	3	5
8037-1	4	2	4
8040-1	3	1	7
8041-1	4	3	6
8046-1	2	2	8
10120-1	3	1	5
10121-1	2	1	3
10122-1	3	2	7
10123-1	3	2	6
10124-1	2	1	9
10125-1	2	0	4
10126-1	3	0	1
10127-1	4	2	6
10128-1	3	1	7
10129-1	3	1	7
1102-2	3	1	13
1103-2	4	1	11
1113-2	2	1	8
1118-2	3	1	10
1154-2	4	2	9
1156-2	2	3	6
1162-2	4	2	8
1167-2	2	0	9
1175-2	3	0	5
1177-2	3	0	10
1184-2	4	1	9
1188-2	2	2	10
1189-2	5	3	11
2216-2	2	0	7
2217-2	3	0	10
2225-2	1	2	8
2234-2	3	1	9
2244-2	5	1	12
2249-2	2	2	11
2252-2	4	1	11
5101-2	2	4	7
5104-2	5	2	6
5106-2	3	1	8
5121-2	2	1	6
5123-2	4	2	9
5155-2	3	2	10
5200-2	3	3	8
5232-2	1	4	8
8001-2	3	0	9
8006-2	3	1	16
8007-2	4	1	9
8008-2	4	2	11
8011-2	4	2	9
8015-2	3	2	10
8030-2	4	4	5
8032-2	5	1	10
8034-2	2	2	8
8036-2	3	1	12
8042-2	4	0	8
8051-2	4	1	7
10120-2	4	3	6
10121-2	3	2	12
10122-2	1	3	11
10123-2	1	0	6
10124-2	4	1	11
10125-2	2	0	7
10126-2	3	2	10
10127-2	2	1	9
10128-2	3	1	3
10129-2	5	1	8

## Sheet: Spp Abbreviations
List of 4 letter abbreviations used in this file and corresponding Latin names for species
MILO	Microtus longicaudus
NEME	Neotoma mexicana
PEBO	Peromyscus boylii
PEMA	Peromyscus maniculatus
SOMO	Sorex monticolus
TADO	Tamias dorsalis
ABSQ	Sciurus aberti
BLBE	Ursus americanus
BOBC	Lynx rufus
GRFO	Urocyon cinereoargenteus
MOLI	Puma concolor
ROSQ	Otospermophilus variegatus
STSK	Mephitis mephitis
WHDE	Odocoileus virginianus
AMRO	Turdus migratorius
HETH	Catharus guttatus
STJA	Cyanocitta stelleri
YEJU	Junco phaeonotus
